# Supplementary material
Source: publisher site journal article supplement (https://www.dovepress.com/article/346809)
Supplement: Supplementary file 1 [file get_supplementary_file.php]

**Supplementary Figure 1** The funnel plot for postoperative opioid consumption showed symmetry.


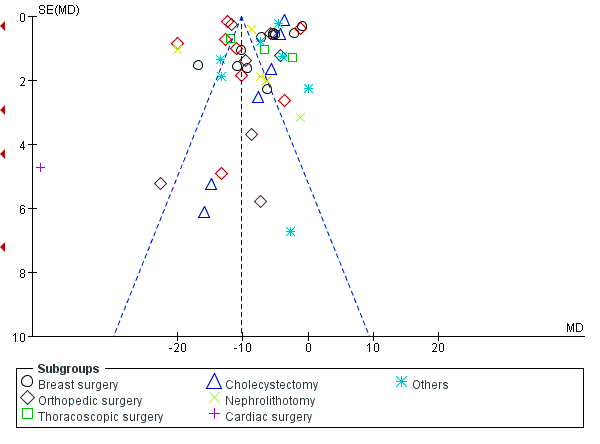


**Supplementary Figure 2** Time to first rescue analgesia


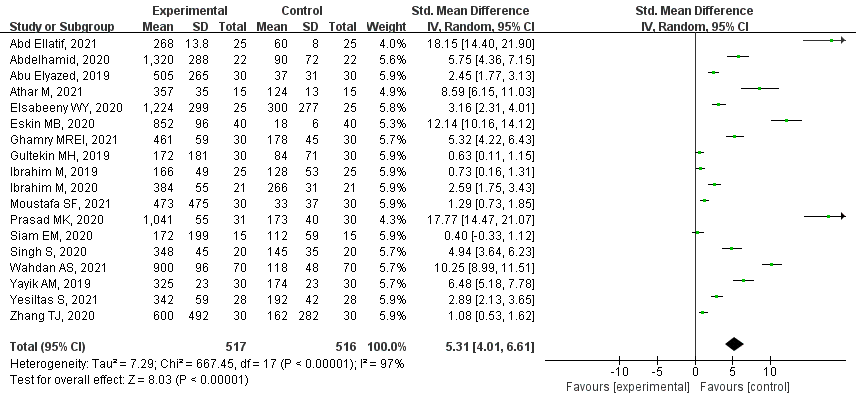


**Supplementary Figure 3** Rescue analgesia requirement


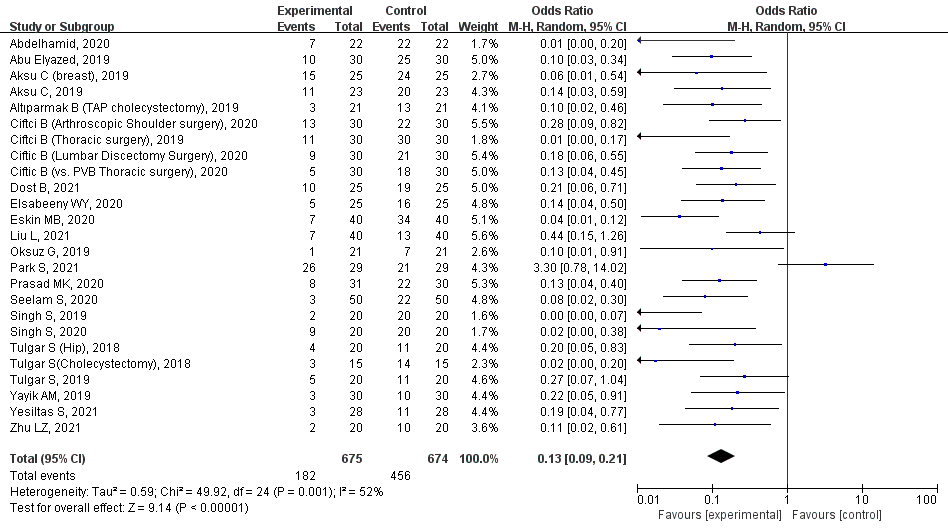


**Supplementary Figure 4** The incidence of PONV


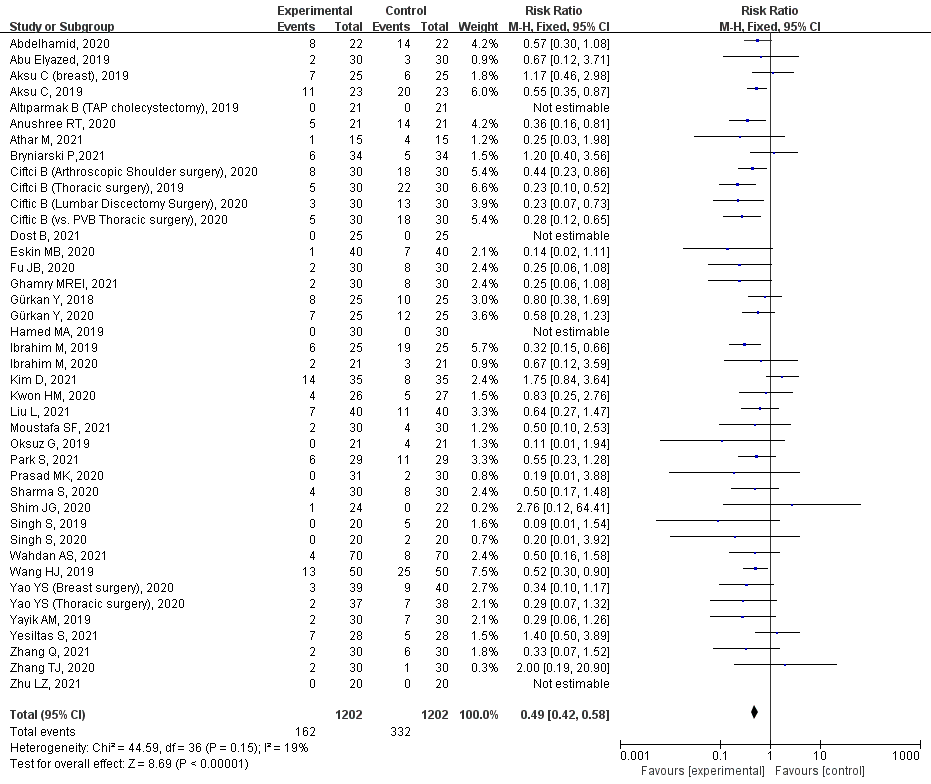


**Supplementary Table 1** Search terms

| “Erector spinal plane block” | AND | “Randomized controlled trial” |
| --- | --- | --- |
| OR “erector spinae plane block” | OR “Controlled clinical trial” |
| OR “erector” | OR “Randomized” |
| OR “ESPB” | OR “Randomly” |
|  | OR “Trial” |
